# Supplementary material for: Finding novel distinctions between the sAPPα-mediated anabolic biochemical pathways in Autism Spectrum Disorder and Fragile X Syndrome plasma and brain tissue
Source: PubMed Central journal article supplement (PMC4876513; doi:10.1038/srep26052), 2016-05-23
Supplement: srep26052-s1.pdf [file srep26052-s1.pdf]

## **Finding novel distinctions between the sAPP $\alpha$ -mediated anabolic biochemical pathways in Fragile X Syndrome and idiopathic Autism plasma and brain tissue**

Balmiki Ray, Deborah K. Sokol, Bryan Maloney, & Debomoy K. Lahiri

### **Supplemental Material: Age covariate**

Age was available for all subjects. Brain models were run with and without age as a covariate. In all cases except ADAM17, these produced weaker models, as measured by second-order Akaike information criterion. These models are presented herein. FXS samples had to be excluded from the analysis due to small N vs. the number of factors and interactions. Levels of sAPP $\alpha$ , total sAPP, and the ratio of sAPP $\alpha$  to total sAPP had no significant differences for either factor or for the diagnosis  $\times$  age interaction (A-C). A $\beta$  may be more interesting. DEA-extracted (membrane-bound) A $\beta$ 40 showed a distinct interaction between diagnosis and age. Specifically, while DEA-extracted A $\beta$ 40 did not change with age among control subjects, it decreased with age in ASD, although neither age nor diagnosis were significant by itself in this model. Conversely, while soluble A $\beta$ 40 decreased with age in control subjects, it remained steady in ASD. However, while difference by diagnosis was significant, the interaction with age was not. Total A $\beta$ 40 did not show significant differences in the two-way model by diagnosis, age, or their interaction. These models may be interesting particularly if contrasted against the ADAM17 model. Unfortunately, levels of BACE1 ( $\beta$ -secretase), and the other major  $\alpha$ -secretase proteins (ADAM9, ADAM10) were not measured, preventing a more complete overall picture. Likewise, levels of A $\beta$ 42 were not available for analysis. In addition, these models were rejected on the basis of higher AICc (). AICc expresses the Kullback-Liebler divergence, which approximates the information lost in a given model vs. its "fit", taking into account number of terms and sample size. AICc for the two-way models was >2 higher than for diagnosis-only models. With a larger sample size, stronger models may be possible with covariates.

**A. sAPP $\alpha$**

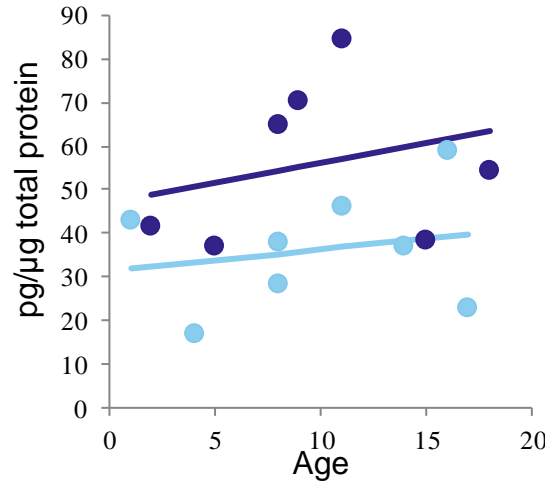

**B. sAPP<sub>TOTAL</sub>**

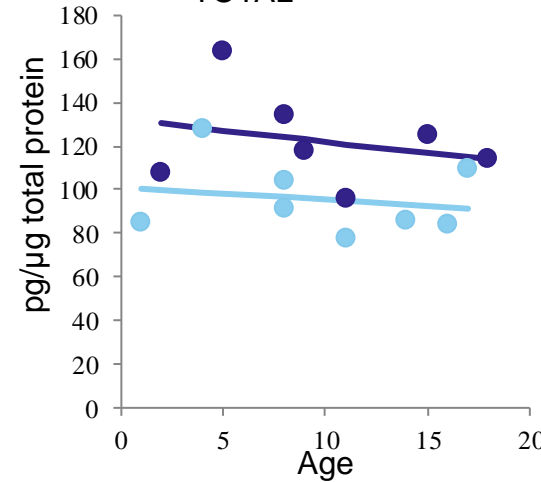

**C. sAPP $\alpha$   $\div$  sAPP<sub>TOTAL</sub>**

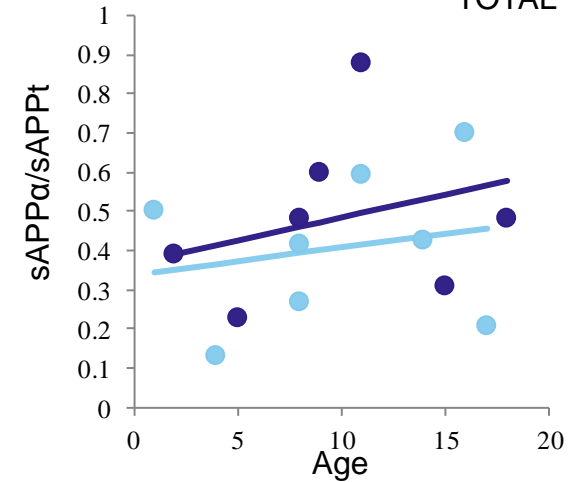

**D. A $\beta$ 40, membrane bound**

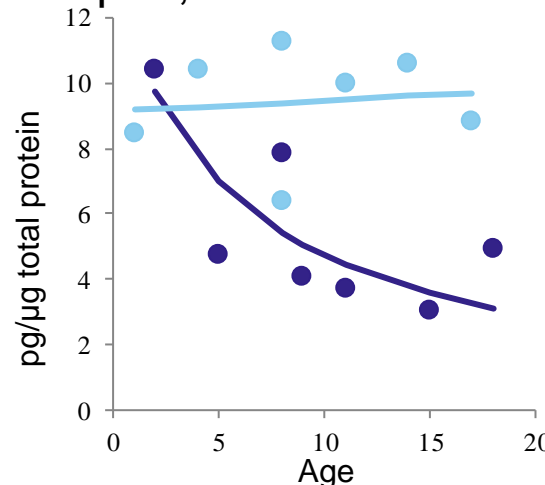

**E. A $\beta$ 40, soluble**

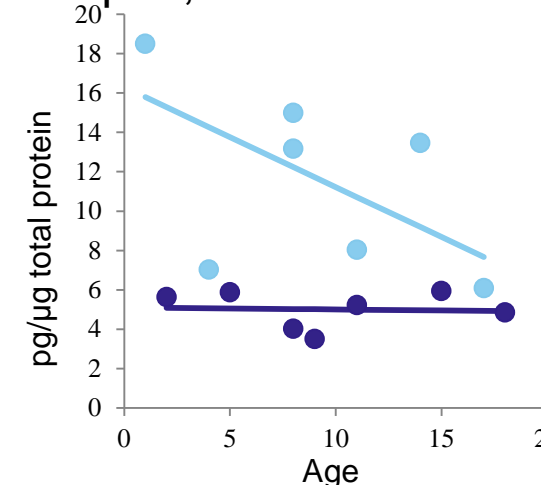

**F. A $\beta$ 40, total**

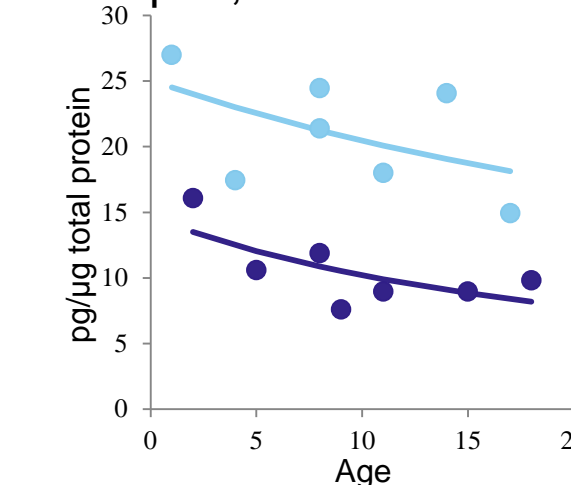

● ASD  
 ● Control

● ASD  
 ● Control

● ASD  
 ● Control

Factor p  $\omega^2$   
 Diagnosis 0.340 0.000  
 Age 0.019 0.248  
 Diag  $\times$  Age 0.021 0.239

Factor p  $\omega^2$   
 Diagnosis 0.003 0.504  
 Age 0.899 0.000  
 Diag  $\times$  Age 0.155 0.047

Factor p  $\omega^2$   
 Diagnosis 0.078 0.135  
 Age 0.058 0.169  
 Diag  $\times$  Age 0.211 0.037
